# Supplementary material for: Deciphering seasonal effects of triggering and preparatory precipitation for improved shallow landslide prediction using generalized additive mixed models
Source: Copernicus journal article supplement (doi:10.5194/nhess-23-1483-2023), 2023-04-21
Supplement: Supplementary file 1 [file nhess-23-1483-2023-supplement.zip]

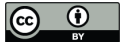

*Supplement of*

## **Deciphering seasonal effects of triggering and preparatory precipitation for improved shallow landslide prediction using generalized additive mixed models**

**Stefan Steger et al.**

*Correspondence to:* Stefan Steger ([stefan.steger@eurac.edu](mailto:stefan.steger@eurac.edu))

- [nhess-23-1483-2023-supplement-title-page.pdf](#)
- [Animation.gif](#)

The copyright of individual parts of the supplement might differ from the article licence.
