# Supplementary material for: Deciphering seasonal effects of triggering and preparatory precipitation for improved shallow landslide prediction using generalized additive mixed models
Source: Copernicus journal article supplement (doi:10.5194/nhess-23-1483-2023), 2023-04-21
Supplement: Supplementary file 2 [file nhess-23-1483-2023-supplement.zip]

Archive with 2 entries (2 files):
- Animation.gif
- nhess-23-1483-2023-supplement-title-page.pdf
